# Supplementary material for: New Approach to Preparation of Heat-Resistant “Lola-M” Fiber
Source: MDPI journal article supplement (doi:10.3390/ma12213490), 2019-10-25
Supplement: s1 [file s1]

## Supplementary Materials

# New Approach to Preparation of Heat-Resistant “Lola-M” Fiber

Igor I. Ponomarev <sup>1,\*</sup>, Ivan Y. Skvortsov <sup>2</sup>, Yulia A. Volkova <sup>1</sup>, Ivan I. Ponomarev <sup>1</sup>, Lydia A. Varfolomeeva <sup>2</sup>, Dmitry Y. Razorenov <sup>1</sup>, Kirill M. Skupov <sup>1,\*</sup>, Mikhail S. Kuzin <sup>2</sup> and Olga A. Serenko <sup>1</sup>

<sup>1</sup> A.N. Nesmeyanov Institute of Organoelement Compounds of Russian Academy of Sciences, Vavilova St., 28, Moscow, 119991, Russia

<sup>2</sup> A.V. Topchiev Institute of Petrochemical Synthesis of Russian Academy of Sciences, Leninsky Av., 29, Moscow, 119991, Russia

\* Correspondence: gagapon@ineos.ac.ru (I.I.P.); kskupov@gmail.com (K.S.)

## 1. $G'$ and $G''$ Data for P3 and P4 Solutions

$G'$  and  $G''$  data for P3 solution heated at 60 °C, 2.5 h, compared to fresh solution at 60 °C and  $G'$  and  $G''$  data for P3 solution at 25 °C compared with P3 solution after 25 °C, 12 h (which is actually P4 solution) are shown below.

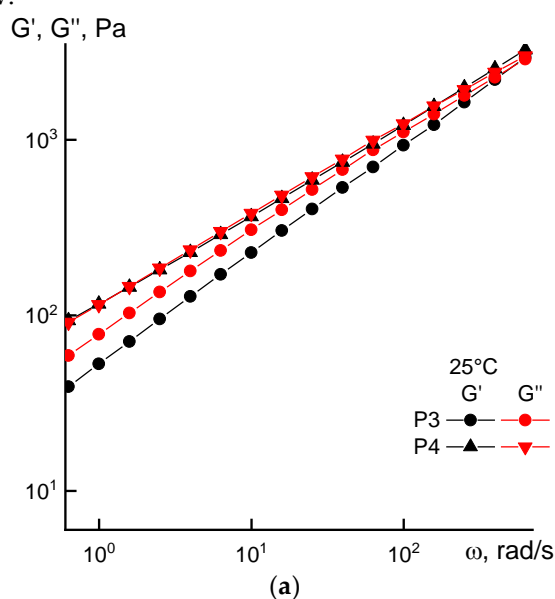

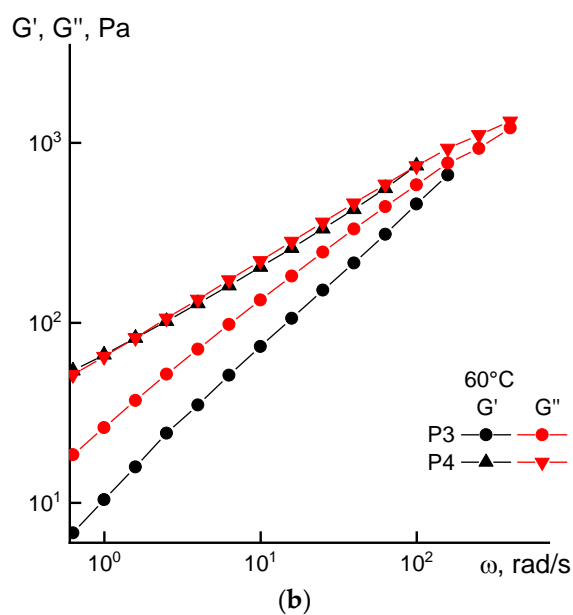

Figure S1.  $G'$  and  $G''$  data for P3 and P4 solutions (a) 25 °C, (b) 60 °C

## 2. Flow Time for P3

Flow times (Ubbelohde viscometer) for P3 solution for different concentrations are shown below in the table.

Table S1. Flow time for P3

| c, g/mL | t, s |
|---------|------|
| 0       | 123  |
| 0.13    | 175  |
| 0.3     | 258  |
| 0.51    | 385  |
| 1.04    | 937  |

## 3. Exponential Increase of Viscosity

Both solutions, P1 and P3, upon heating at 60 °C show exponential-like molecular weight increase with the extent of conversion, since this is a condensation polymerization. Data for complex viscosity change are shown below.

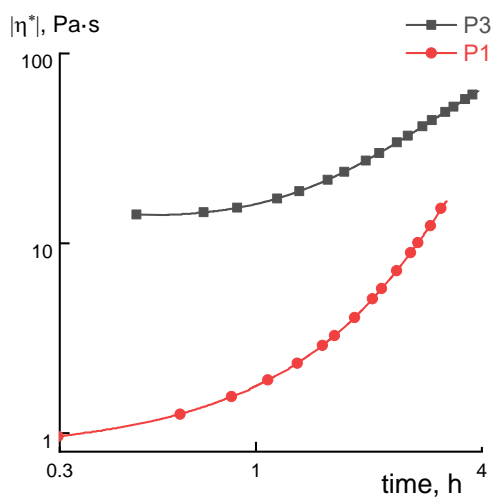

Figure S2. Exponential increase of viscosity

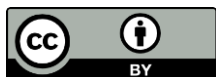

© 2019 by the authors. Submitted for possible open access publication under the terms and conditions of the Creative Commons Attribution (CC BY) license (<http://creativecommons.org/licenses/by/4.0/>).
